# Supplementary material for: Interdomain Contacts Control Native State Switching of RfaH on a Dual-Funneled Landscape
Source: PubMed Central journal article supplement (PMC4521827; doi:10.1371/journal.pcbi.1004379), 2015-07-31

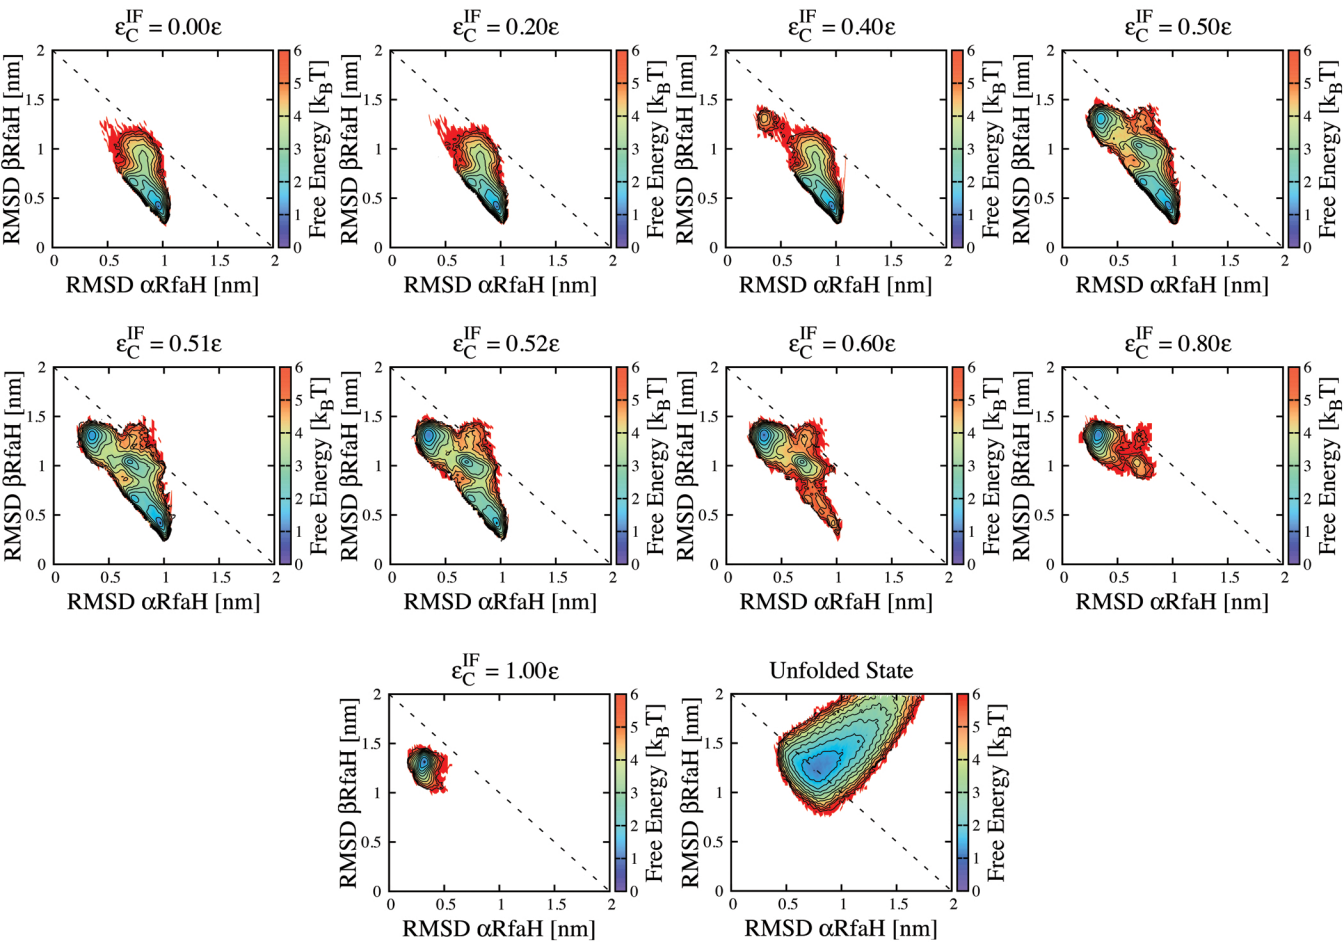

Supplement: pcbi.1004379.s002.pdf [file pcbi.1004379.s002.pdf]
