# Supplementary material for: Interdomain Contacts Control Native State Switching of RfaH on a Dual-Funneled Landscape
Source: PubMed Central journal article supplement (PMC4521827; doi:10.1371/journal.pcbi.1004379), 2015-07-31
Supplement: pcbi.1004379.s005.pdf [file pcbi.1004379.s005.pdf]

**A**

mut. frust.

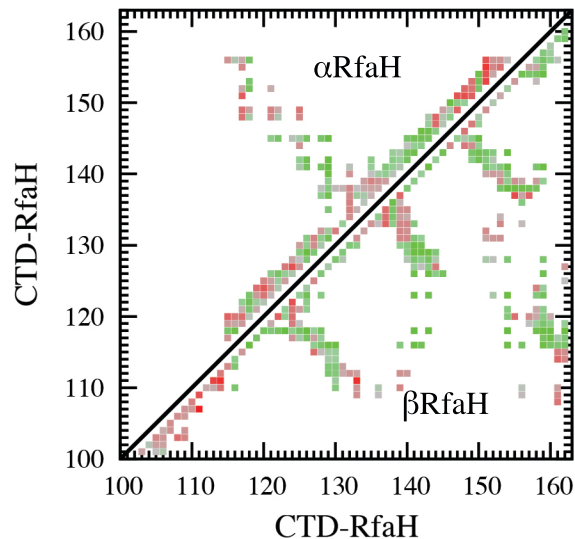

conf. frust.

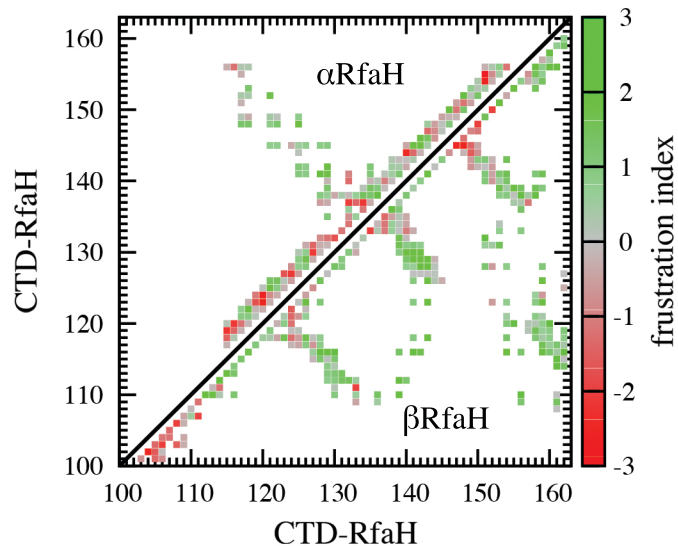**B**

|          | 101                                                            | 111 | 121  | 131   | 141   | 151     | 161        |
|----------|----------------------------------------------------------------|-----|------|-------|-------|---------|------------|
| RfaH-CTD | PKDIVDPATPYPGDKVIITEGAFEGFQAIIFTEPDGEARSMLLLNINKEIKHSVKNTEFRKL |     |      |       |       |         |            |
| JNET     | -----                                                          |     | EEEE | ----- |       | EEEEHHH | -----      |
| JHMM     | -----                                                          |     | EEEE | EEEE  | ----- | EEEE    | -----      |
| JPSSM    | -----                                                          |     | EEEE | HH    | EE    | -----   | HHHHHHHHHH |
|          | -----                                                          |     | EEEE | ----- |       | EEEE    | -----      |
