# Supplementary material for: Interdomain Contacts Control Native State Switching of RfaH on a Dual-Funneled Landscape
Source: PubMed Central journal article supplement (PMC4521827; doi:10.1371/journal.pcbi.1004379), 2015-07-31

A  $i > j + 3, \epsilon_C^{IF} = 1.00$

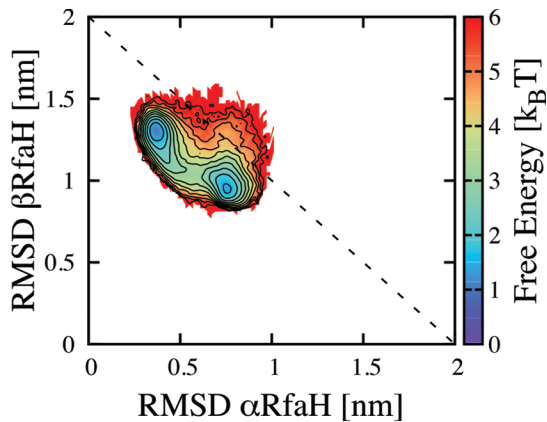

B  $i > j + 3, \epsilon_C^{IF} = 0.70$

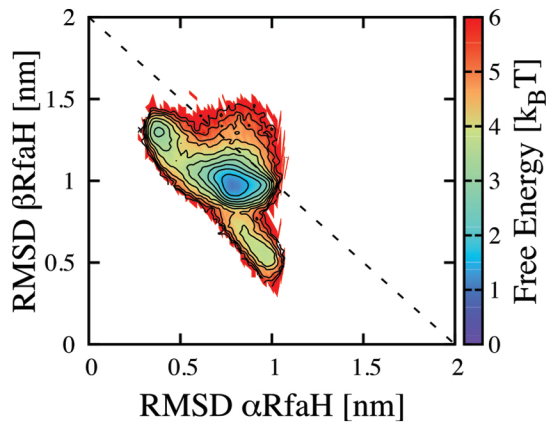

C  $i > j + 2$

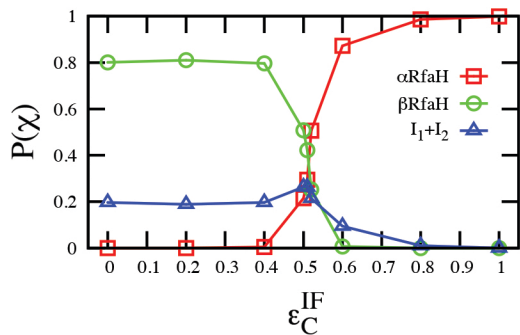

D  $i > j + 3$

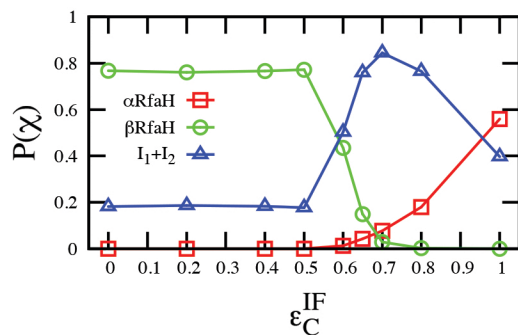

Supplement: pcbi.1004379.s007.pdf [file pcbi.1004379.s007.pdf]
